# Supplementary material
Source: PubMed Central journal article supplement (PMC2634593)
Supplement: prion0103_0198SD1.pdf [file prion0103_0198SD1.pdf]

Research Paper

# Toxic Effects of Intracerebral PrP Antibody Administration During the Course of BSE Infection in Mice

**Maxime Lefebvre-Roque**<sup>1–3</sup>

**Elisabeth Kremmer**<sup>4</sup>

**Sabine Gilch**<sup>5</sup>

**Wen-Quan Zou**<sup>6</sup>

**Cécile Féraudet**<sup>7</sup>

**Chantal Mourton Gilles**<sup>8</sup>

**Nicole Salès**<sup>1</sup>

**Jacques Grassi**<sup>7</sup>

**Pierluigi Gambetti**<sup>6</sup>

**Thierry Baron**<sup>3</sup>

**Hermann Schätzl**<sup>5</sup>

**Corinne Ida Lasmézas**<sup>1,\*</sup>

<sup>1</sup>Department of Infectology; The Scripps Research Institute; Jupiter, Florida USA

<sup>2</sup>Department of Medical Research; Commissariat à l'Energie Atomique; Fontenay aux Roses, France

<sup>3</sup>Unité ATNC; Agence Française de Sécurité Sanitaire des Aliments; Lyon, France

<sup>4</sup>GSF- Institut für Molekulare Immunologie; Munich, Germany

<sup>5</sup>Institute of Virology; Technical University of Munich; Munich, Germany

<sup>6</sup>Institute of Pathology and National Prion Disease Pathology Surveillance Center; Case Western Reserve University; Cleveland, Ohio USA

<sup>7</sup>Service de Pharmacologie et d'Immunologie; Commissariat à l'Energie Atomique; Gif sur Yvette, France

<sup>8</sup>CNRS UMR 5160; Faculté de Pharmacie; Montpellier, France

\*Correspondence to: Corinne Ida Lasmézas; The Scripps Research Institute; Jupiter, Florida 33458 USA; Tel : 561.799.8895; Fax : 561.799.8960; E mail: lasmezas@scripps.edu

Original manuscript submitted: 06/15/07

Revised manuscript submitted: 08/10/07

Manuscript accepted: 08/15/07

This manuscript has been published online, prior to printing for Prion, Volume 1, Issue 3. Definitive page numbers have not been assigned. The current citation is: Prion 2007; 1(3):

<http://www.landesbioscience.com/journals/prion/article/4870>

Once the issue is complete and page numbers have been assigned, the citation will change accordingly.

## KEY WORDS

prion, PrP, BSE, mice, passive immunization, intracerebral injection, anti PrP antibody, neurotoxicity

## SUPPLEMENTAL MATERIAL

## **Supplementary Methods**

### **Recognition of native PrP in FACS by the 4H11 antibody**

4H11 binding capacity to native cell-surface PrP<sup>c</sup> was tested by flow cytometry measurements on infected and non-infected N2a cells overexpressing murine PrP (kindly provided by S. Lehmann<sup>38</sup>). Confluent cells (3-day culture) were washed with PBS, incubated at 37°C for 5 min with cell dissociation buffer (Sigma) before splitting into equal samples of 50 µl containing  $5 \times 10^5$  cells. These samples were incubated for 20 min at room temperature with 0.5 µg of primary antibody (either 4H11 IgG2a, positive control anti-PrP IgG2a antibodies SAF34 or BAR214, or isotypic control antibody NSP-11 (anti-substance P)). After washes, cells were reacted with the secondary antibody, phycoerythrin-conjugated goat anti-mouse IgG 1:100 (Beckman Coulter), for 20 min at room temperature in the dark. On completion of washing, samples were resuspended in 1 ml of PBS and immediately analyzed in a flow cytometer (Epics XL, Beckman Coulter) equipped with a 488-nm argon laser, previously calibrated with flow check beads (Beckman Coulter).

### **In vitro evaluation of therapeutic effect of the 4H11 antibody**

The prion-infected (strain RML) mouse neuroblastoma cell line 3F4-ScN2a has been described<sup>39</sup>. Cells were treated in duplicate for 5 days with different concentrations of either 4H11 or the F(ab')<sub>2</sub> fragment. A non-related IgG2a (5 µg/ml) antibody and untreated cells served as a controls. The medium was changed every other day with addition of fresh antibodies. After 5 days, cells were lysed for 10 min in lysis buffer (10 mM Tris-HCl, pH 7.5; 100 mM NaCl; 10 mM EDTA; 0.5% Triton X-100; 0.5% Na-deoxycholate) and subjected to proteinase K (PK) digestion for 30 min at 37° C with a PK concentration of 20 µg/ml lysate. PK treatment was terminated by addition of Pefabloc protease inhibitor (Roche; 1 mM). Following precipitation with 5 volumes of methanol, an aliquot of resuspended samples was analysed in immunoblot as described<sup>39</sup>. The antibody 4H11 was used for the

detection of PrP<sup>Sc</sup> specific bands.

## **Supplementary Results.**

### **Recognition of native PrP by the 4H11 antibody**

Binding of different anti-PrP IgG2a to native murine PrP<sup>C</sup> at the surface of non infected cells was compared. The binding capacity of the 4H11 was at least similar or even better than those of two other anti-PrP antibodies, SAF34 (anti-octarepeat) and BAR214 (conformational epitope) previously described to inhibit PrP<sup>Sc</sup> replication in infected cell line models<sup>10</sup> (Supplementary Figure 1a).

Anti-PrP 4H11 IgG2a binding capacity to cell-surface PrP was tested by flow cytometry measurements on prion-infected and non-infected N2a cells. A higher staining intensity of the 4H11 to the surface of non-infected N2a cells than on infected ones was observed (Supplementary Figure 1b).

### **Therapeutical effect of the 4H11 antibody on ScN2a cell**

In order to evaluate the potential of 4H11 antibody and F(ab')<sub>2</sub> fragments thereof to interfere with prion propagation, we employed a well-established cell culture system. Persistently infected 3F4-ScN2a cells were treated for 5 days with varying concentrations of antibodies (0.1, 0.5, 1, 2.5 or 5 µg/ml). Untreated cells or cultures treated with a non-related IgG2a antibody were used as negative controls. Immunoblot analysis of proteinase K-treated cell lysates revealed that both the full IgG molecule and the F(ab')<sub>2</sub> fragment inhibited PrP<sup>Sc</sup> propagation (Supplementary Figure S2). Whereas the negative controls (lanes 1 and 2) harboured high amounts of PrP<sup>Sc</sup>, the signals were completely abolished in cells treated with higher concentrations of the antibodies (lanes 3, 4, 8, 9 and 10). With the lower doses of 4H11, the PrP<sup>Sc</sup> signal was still significantly reduced (lanes 5-7), with F(ab')<sub>2</sub> a strong reduction was still found with 0.5 µg/ml (lane 11), whereas the signal intensity of cells treated with 0,1 µg/ml was comparable to the control cells (lane 12).

These experiment shows that both the full IgG 4H11 and the F(ab')<sub>2</sub> fragment can inhibit prion propagation, with an IC<sub>50</sub> of 5 and 3 nM respectively.

## Supplementary Figure. S1.

S1. a

Non-infected N2a

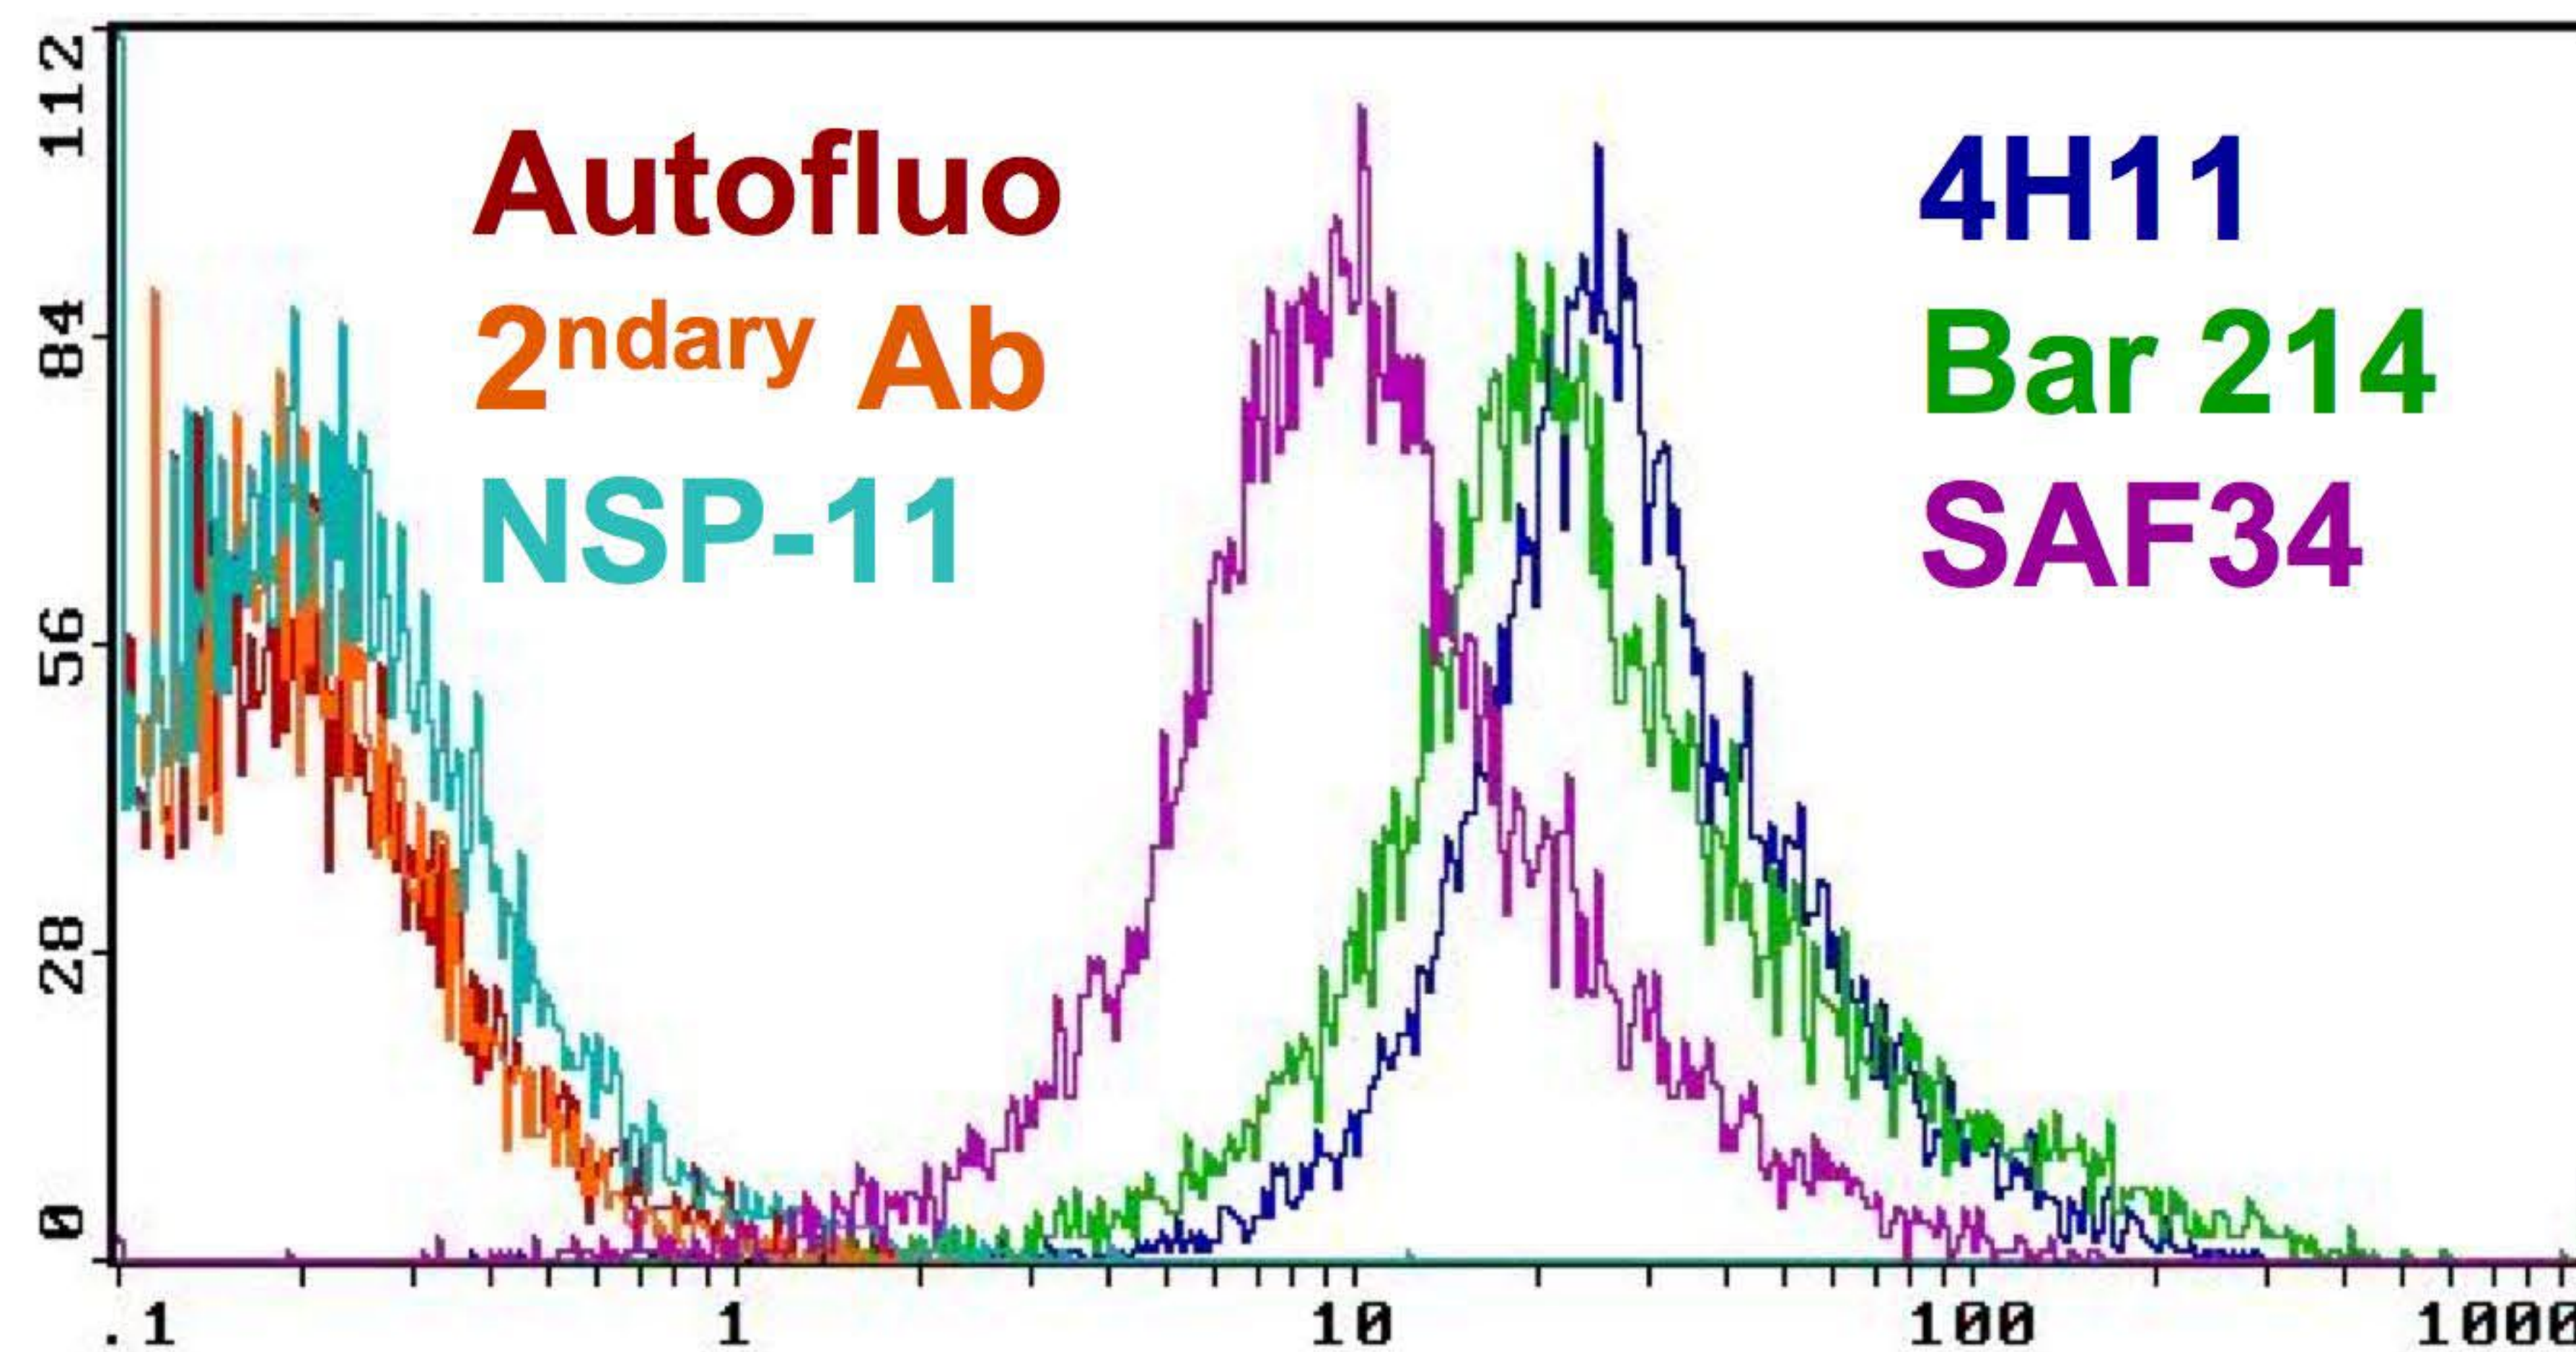

S1. b

4H11 staining

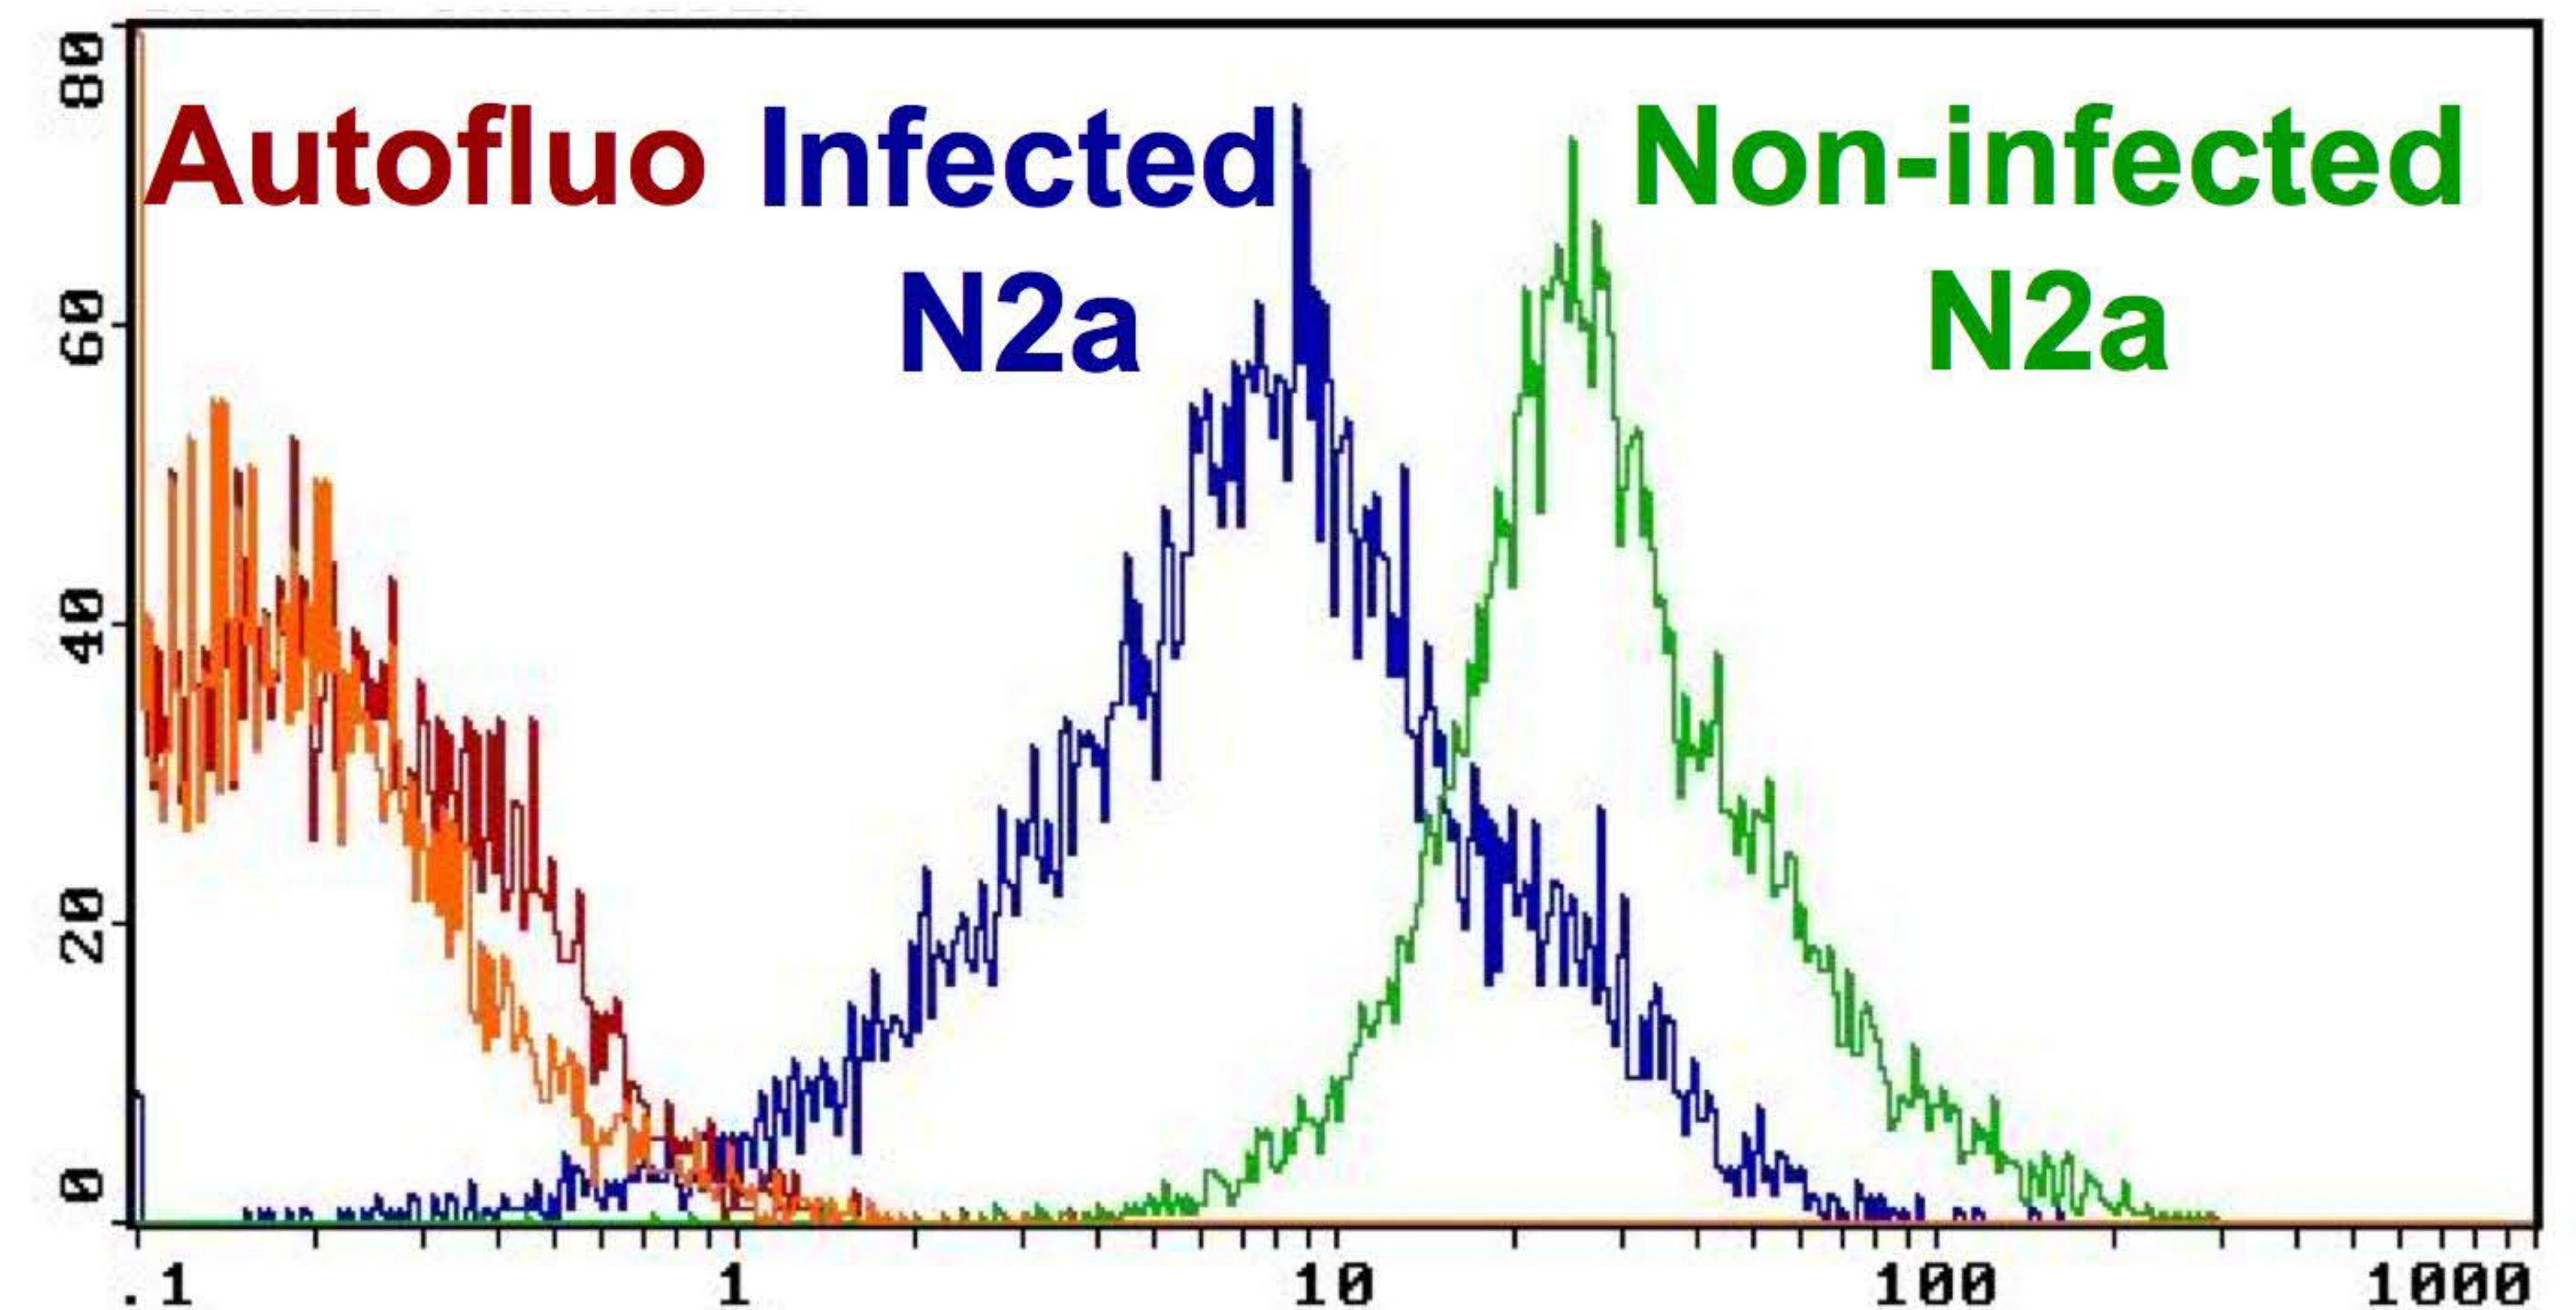

**Supplementary Figure. S1.** Recognition of native PrP by the 4H11 antibody.

S1.a - Comparative flow cytometry staining intensities using different anti-PrP IgG2a antibodies on living non-infected N2a cells. Autofluorescence: red line; secondary antibody alone: orange line; isotypic control NSP-11: turquoise- blue line; SAF34: purple line; BAR214: green line; 4H11: dark blue line. S1.b - Comparative flow cytometry analysis of 4H11 binding capacity to non-infected and infected N2a cells (autofluorescence: red line; 4H11: green or blue line).

## Supplementary Figure. S2.

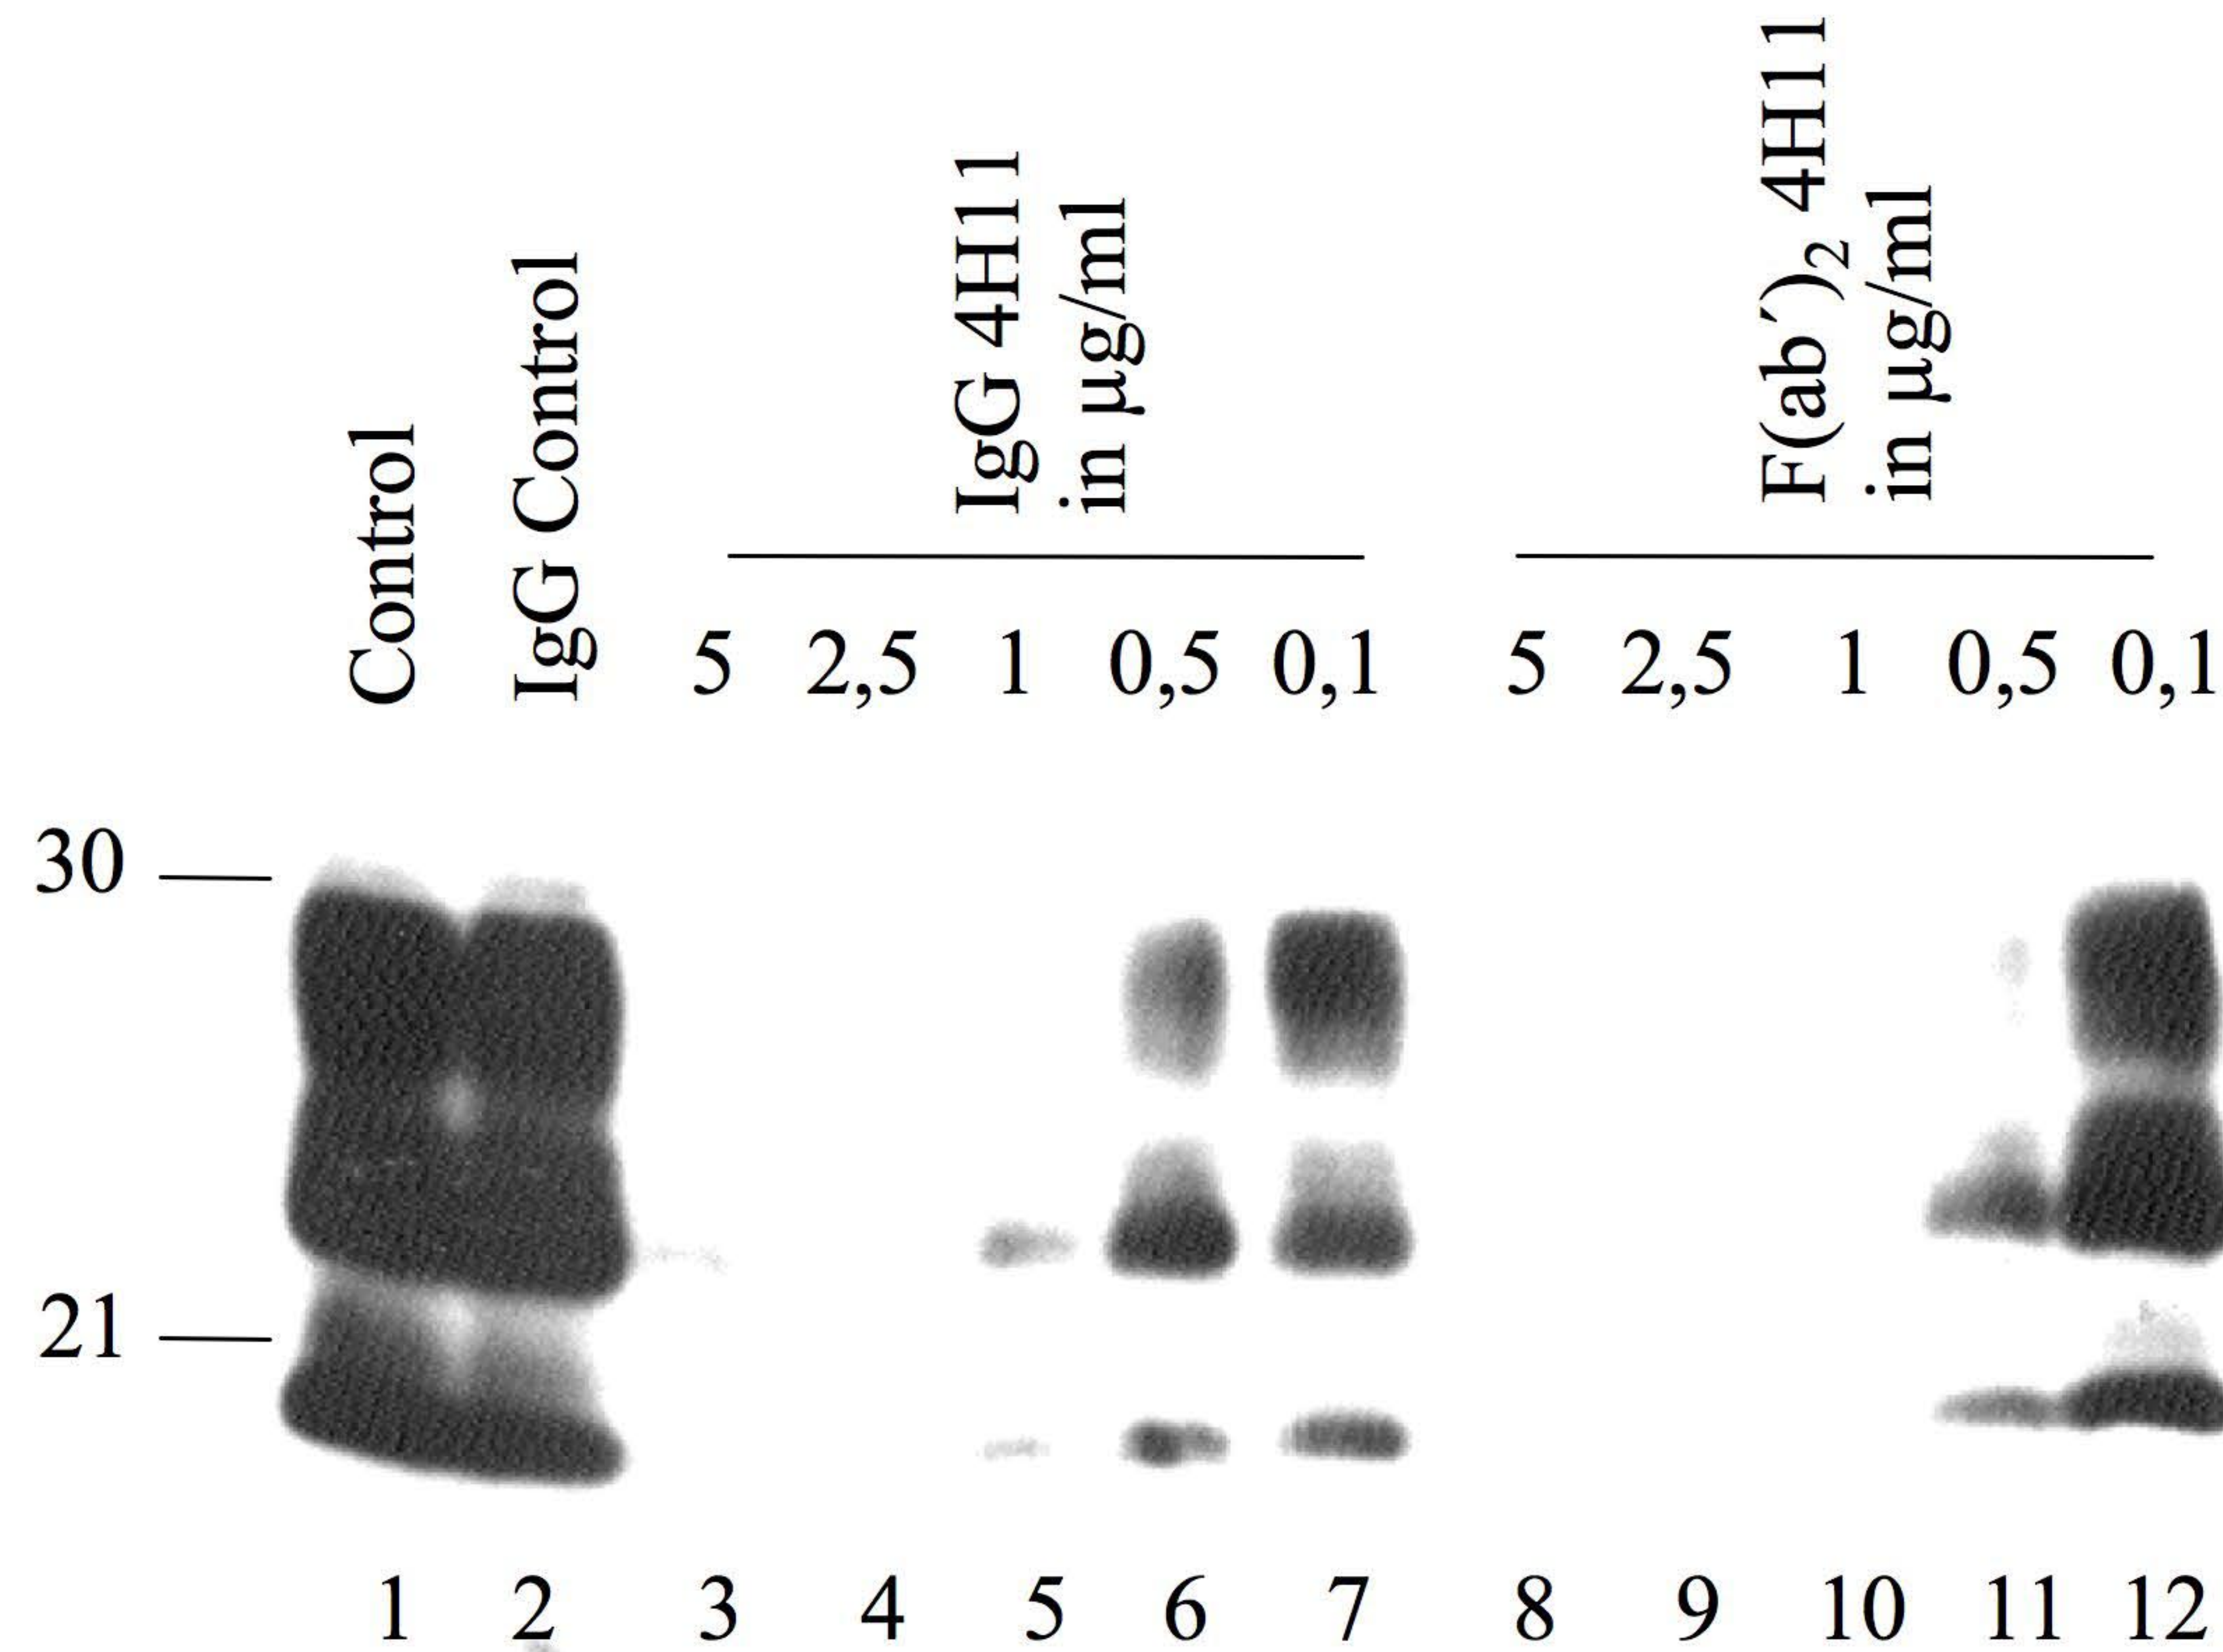

## Supplementary Figure. S2.

The protective effect of the 4H11 was first evaluated on Scrapie N2a cells. Chronically infected cells were incubated with different concentrations of the anti-PrP IgG (lanes 3-7) or F(ab')<sub>2</sub> (lanes 8-12). Controls include non treated cells (lane 1) and cells incubated with an irrelevant IgG (lane 2). At the end of the 5 days treatment, cells were harvested and PK digested to detect PrP<sup>Sc</sup>.
